1     **Mechanism of the CBM35 domain in assisting catalysis by Ape1, a *Campylobacter jejuni* O-acetyl**  
2                                            **esterase**

3  
4

5             Chang Sheng-Huei Lin<sup>1\*</sup>, Ian Y. Yen<sup>1\*</sup>, Anson C. K. Chan<sup>1</sup>, Michael E. P. Murphy<sup>1#</sup>

6  
7

8     <sup>1</sup>Department of Microbiology & Immunology, The University of British Columbia, Vancouver, BC, V6T  
9                                            1Z3, Canada

10  
11

12                                           #Corresponding author: Michael E. P. Murphy

13                                           E-mail: [michael.murphy@ubc.ca](mailto:michael.murphy@ubc.ca)

14  
15

15                                           **Running title:** CBM35 assists Ape1 activity

16     **\*Co-First Authors**

17     **Keywords:** *Campylobacter*, peptidoglycan, O-acetyl esterase, SGNH hydrolase, CBM35, carbohydrate-  
18     binding protein, crystal structure, site-directed mutagenesis, docking

19  
20

## 21 **Abstract**

22 Peptidoglycan (PG) is *O*-acetylated by bacteria to resist killing by host lysozyme. During  
23 PG turnover, however, deacetylation is a prerequisite for glycan strand hydrolysis by lytic  
24 transglycosylases. Ape1, a de-*O*-acetylase from *Campylobacter jejuni*, is a bi-modular protein  
25 composed of an SGNH hydrolase domain and a CBM35 domain. The conserved Asp-His-Ser  
26 catalytic triad in the SGNH hydrolase domain confers enzymatic activity. The PG binding mode  
27 and function of the CBM35 domain in de-*O*-acetylation remained unclear. In this paper, we  
28 present a 1.8 Å resolution crystal structure of a complex between acetate and Ape1. An active  
29 site cleft is formed at the interface of the two domains and two large loops from the CBM35  
30 domain form part of the active site. Site-directed mutagenesis of residues in these loops coupled  
31 with activity assays using *p*-nitrophenol acetate indicate the CBM35 loops are required for full  
32 catalytic efficiency. Molecular docking of a model *O*-acetylated hexasaccharide PG substrate to  
33 Ape1 using HADDOCK suggests the interaction is formed by the active cleft and the saccharide  
34 motif of PG. Together, we propose that the active cleft of Ape1 diverges from other SGNH  
35 hydrolase members by using the CBM35 loops to assist catalysis. The concave Ape1 active cleft  
36 may accommodate the long glycan strands for selecting PG substrates to regulate subsequent  
37 biological events.

## 38 Introduction

39 Bacterial peptidoglycan (PG) is responsible for osmotic stress resistance and cell shape  
40 maintenance. The PG polymer consists of linear glycan strands of repeating  $\beta$ -(1-4)-*N*-  
41 acetylglucosamine (GlcNAc) and *N*-acetylmuramic acid (MurNAc) units crosslinked by short  
42 peptide stems attached to the MurNAc residues. The MurNAc residue of nascent PG in most  
43 Gram-negative bacteria is covalently linked to the pentapeptide composed of L-alanine (L-Ala),  
44 D-glutamate (D-Glu), *meso*-diaminopimelic acid (*m*-DAP), and two terminal D-alanine (D-Ala)  
45 residues. Nascent PG is polymerized to existing PG by transglycosylases, and transpeptidases  
46 catalyze 4-3 cross-linkages between (D) *m*-DAP and D-Ala or 3-3 cross-linkages between (L) *m*-  
47 DAP and D-Ala of neighboring peptide stems (1). The structure of PG is constantly modified  
48 during cell growth and division, as well as to protect against host defenses and antibiotics, and  
49 for the assembly of trans-envelope machineries like pili and flagella (2). PG modifications  
50 include cleavage of glycosidic bonds by muramidases to reduce glycan chain length, peptide  
51 stem cleavage by carboxypeptidases, and peptide cross-linkage cleavage by endopeptidases.

52 *O*-acetylation at the C6 hydroxyl group of MurNAc adds another level of chemical  
53 diversity to mature PG, and serves in a protective role to resist cell lysis by lysozymes produced  
54 by mammalian innate immune systems. Pathogens such as *Staphylococcus aureus*, *Enterococcus*  
55 *faecalis*, *Listeria monocytogenes* and *Neisseria gonorrhoeae* that contain *O*-acetylated PG are  
56 found to be more resistant to lysozymes (3-6). The level of PG *O*-acetylation is determined by  
57 enzymes encoded by the *O*-acetylation of peptidoglycan (OAP) regulon (7). In Gram-positive  
58 bacteria, the bi-functional protein OatA translocates cytoplasmic acetyl moieties to the periplasm  
59 and acetylates the C6 hydroxyl group of PG MurNAc (8-10). In Gram-negative bacteria, a two-  
60 component system, PatA and PatB, performs the activities of OatA (11-13). The OAP regulon

61 encodes a third gene named *ape1*. Ape1 is a periplasmic *O*-acetyl esterase that hydrolyzes *O*-  
62 acetylated MurNAc within the PG polymer to produce de-*O*-acetylated MurNAc (14). De-*O*-  
63 acetylation by Ape1 is proposed to regulate PG turnover by lytic transglycosylases (LTs) (15),  
64 which can only cleave the  $\beta$ -(1-4)-glycosidic bond between de-*O*-acetylated MurNAc and  
65 GlcNAc to generate glycan stands with an 1,6-anhydroMurNAc end (16).

66 *Campylobacter jejuni* is a Gram-negative, helical-shaped, human enteric pathogen. It is a  
67 leading cause of bacterial food-borne diarrhea. Infections by *C. jejuni* can lead to autoimmune  
68 responses in intestines (e.g., inflammatory bowel disease), joints (e.g., reactive arthritis) and  
69 nerves (e.g., Guillain-Barré Syndrome) (17,18). The OAP regulon, particularly the *ape1* gene,  
70 contributes to *C. jejuni* pathogenesis (19). An *ape1* deletion strain showed increased PG *O*-  
71 acetylation, irregular comma-shaped cell morphologies, and a 30% reduction of wild-type  
72 motility on agar plates. The  $\Delta$ *ape1* mutant strain was significantly impaired in invasion of  
73 intestinal INT407 cells and in a chick model post infection showed a 4.4-log CFU/g decrease in  
74 the cecum compared to wild-type. Furthermore,  $\Delta$ *ape1* PG composition showed reduced 1,6-  
75 anhydroMurNAc content and elongated glycan strands, supporting the hypothesis that Ape1  
76 activity is an important prerequisite for LT cleavage (19,20). Conversely, deletion of the entire  
77 OAP regulon or either *patA* or *patB* in a *C. jejuni* strain showed reduced *O*-acetylation levels in  
78 PG and have the same glycan strand length of wild-type (19). These mutant strains did not have  
79 defects in motility or chick colonization ability.

80 Ape1 belongs to the SGNH hydrolase superfamily (7). The catalytic triad consists of Ser,  
81 His, and Asp and opposite this triad are Gly and Asn residues that form the oxyanion hole for  
82 transition state stabilization in the active site (21,22). Mutagenesis of the *N. gonorrhoeae* Ape1  
83 (NgApe1) homolog demonstrated that these conserved active site residues are required for

84 enzyme activity (14,21,23). NgApe1 has higher specific activity towards *O*-acetylated PG  
85 compared to *O*-acetylated xylan (14), suggesting that the enzyme may recognize additional  
86 substrate components beyond the acetyl group. The *N. meningitidis* Ape1 (NmApe1) crystal  
87 structure contains a catalytic domain with an  $\alpha/\beta/\alpha$  fold of the SGNH superfamily (24). The  
88 authors observed that the presence of an acetyl moiety rotates the Ser nucleophile by 90° to be  
89 positioned for optimal catalysis and proposed a substrate-induced mechanism as to prevent  
90 accidental de-*O*-acetylation. The structure also has a carbohydrate binding module of family 35  
91 (CBM35) in addition to the SGNH domain. The function of such domains in Ape1 is not known.  
92 The CBM35 domain is typically found in plant cell wall degrading enzymes and is responsible  
93 for guiding glycosidase domains to uronic acid containing substrates (25,26).

94 In the present study, we determined a 1.8 Å acetate-bound Ape1 crystal structure from *C.*  
95 *jejuni*. We investigated the role of two loops from the CBM35 domain in Ape1 catalysis. Lastly,  
96 we performed molecular docking to propose an Ape1-PG binding mode. Together, our results  
97 highlight the participation of the previously uncharacterized CBM35 domain in Ape1 catalysis.

98

## 99 **Results**

### 100 ***Structure determination of C. jejuni Ape1***

101 *C. jejuni* Ape1 is a 392 amino acid protein containing a predicted signal peptide at  
102 residues 1-21 of the native sequence (*CJJ81176\_0638*) (**Figure 1**). The full-length mature  
103 protein (Ape1<sup>22-392</sup>) was crystallized, and despite diffracting to high resolution (better than 1.6  
104 Å), structure determination was impeded by crystal twinning. A truncated construct with residues  
105 41-392 (Ape1<sup>41-392</sup>) was crystallized and its structure was solved to 1.8 Å resolution by single  
106 anomalous dispersion (SAD) with selenomethionine-labeled protein (SeMetApe1<sup>41-392</sup>). An

107 initial model was automatically built with Phenix AutoBuild (27), resulting in three partial Ape1  
108 monomers in the asymmetric unit. A continuous model was built for two monomers, with the  
109 third monomer incomplete due to disorder.

110 The native Ape1<sup>41-392</sup> protein structure was solved to 1.8 Å resolution by molecular  
111 replacement with one of the complete monomers from the SeMetApe1<sup>41-392</sup> structure. Three  
112 monomers were built and refined to  $R_{\text{work}}$  and  $R_{\text{free}}$  values of 0.17 and 0.19, respectively. The  
113 final model includes three complete Ape1 monomers (residues 41-392), with each monomer  
114 bound to one acetate molecule in the active site. The electron density for the acetate was clearly  
115 defined in electron density maps and was refined to an average  $B$ -factor of 20.7 Å<sup>2</sup>. To explore  
116 the oligomeric state, Ape1<sup>41-392</sup> was analysed by SEC-MALS. In solution, the molecular weight  
117 was determined to be  $37.3 \pm 2.5\%$  kDa, consistent with the predicted molecular weight of the  
118 recombinant Ape1 monomer (41.1 kDa).

119 The Ape1<sup>22-392</sup> structure was solved by molecular replacement with Ape1<sup>41-392</sup> as the  
120 search model and refined assuming merohedral twinned to  $R_{\text{work}}$  and  $R_{\text{free}}$  values of 0.14 and  
121 0.18. The Ape1<sup>22-392</sup> and Ape1<sup>41-392</sup> structures are similar, with a RMSD of 0.16 Å over 352  
122 aligned C $\alpha$  atoms. The Ape1<sup>22-392</sup> structure also contains three monomers in the asymmetric unit  
123 and reveals an additional N-terminal helix (**Figure 1B**). The N-terminal helix of Ape1<sup>22-392</sup>  
124 shows limited contacts to the rest of the protein and its sequence is not conserved amongst  
125 homologs from different species. As the Ape1<sup>41-392</sup> structure is of higher quality, it was used for  
126 all subsequent analyses and will be denoted as CjApe1. All data collection, phasing and  
127 refinement statistics are summarized in **Table 1**.

128

129 *The overall structure of acetate-bound CjApe1*

130 CjApe1 has a rigid two-domain structure with an SGNH hydrolase domain (residues S41-  
131 Y87 and Y228-Y392) and a CBM35 domain (residues I94-T222) interconnected by two short  
132 loops (residues L88-S93 and N223-N227) (**Figure 1**). An extensive interface, with a buried  
133 surface area of 1370 Å<sup>2</sup> as measured using PISA (28), is found between the SGNH and CBM35  
134 domains. The domain-domain interaction is mediated by a hydrophobic core of 19 hydrophobic  
135 amino acids (Ala, Ile, Leu, Met, Val, Trp, Phe, Tyr) from the SGNH domain and 15 hydrophobic  
136 amino acids from the CBM35 domain.

137 The CjApe1 SGNH domain adopts a three-layer  $\alpha/\beta/\alpha$  fold, with a central five-stranded  
138 parallel  $\beta$ -sheet ( $\beta_2$ ,  $\beta_{14}$ ,  $\beta_{15}$ ,  $\beta_{16}$ ,  $\beta_{17}$ ) flanked by 10  $\alpha$ -helices ( $\alpha_1$ - $\alpha_{10}$ ) (**Figure 2A, top**). The  
139 invariant catalytic residues (S73, G237, N270 and H369) are situated within a concave surface  
140 above the parallel  $\beta$ -sheet of CjApe1 (**Figure 2A, bottom**). The catalytic triad (S73-D367-H369)  
141 form a hydrogen bonding network adjacent to a bound acetate molecule. Clear electron density  
142 for the acetate showed that one of the oxygen atoms is 2.7 Å from the amide of G237 and 2.9 Å  
143 from N $\delta_2$  of N270, two residues that comprise the oxyanion hole. The methyl group of the  
144 acetate packs against a conserved hydrophobic cavity formed by L273 and V368. The orientation  
145 of the bound acetate thus likely represents a model for the tetrahedral oxyanion intermediate of  
146 the acetyl moiety of the substrate-enzyme complex.

147 The electrostatic surface potential of CjApe1 was investigated. The side of CjApe with  
148 the shallow active site had a largely positively charged surface. Rotating the molecule along the  
149 long axis by 90° showed a relatively neutral to negatively charged surface (**Figure 2B**). The  
150 positively charged surface of the CjApe1 may help to orient molecule such that the catalytic cleft  
151 is directed towards the negatively charged PG substrate for catalysis.

152           The CBM35 domain of CjApe1 is formed by two sandwiched antiparallel  $\beta$ -sheets ( $\beta$ 3,  
153  $\beta$ 5,  $\beta$ 6,  $\beta$ 8,  $\beta$ 11,  $\beta$ 13 in the first sheet and  $\beta$ 4,  $\beta$ 7,  $\beta$ 9,  $\beta$ 10,  $\beta$ 12 in the second). A structural  
154 homolog search using Dali (29) identified CBM35 domains in various glycoside hydrolases  
155 (**Figure 3A–D**). In these hydrolases, the inter- $\beta$ -strand loops of the CBM35 domain often  
156 coordinate calcium ions and saccharides (26). Saccharide binding by this domain has been  
157 proposed to guide substrate specificity of the associated glycoside hydrolase domain (25,30).  
158 However, these CBM35 domains and CjApe1 shares sequence identities less than 11%  
159 suggesting the CBM35 domain of CjApe1 may have functions other than saccharide binding.  
160 Notably, two large loops of the CjApe1 CBM35 domain (CBML1 and CBML2) are situated  
161 close to the active cleft of the SGNH domain (**Figure 3E**). Inspection of the sequences of  
162 CBML1 (13 amino acids, A97-N109) and CBML2 (16 amino acids, N121-F136) identified  
163 conserved polar (Q105, Q106, N121, S122) and aromatic (Y104 and F132) residues. Inspection  
164 of the CjApe1 structure revealed that the side chains of Q105, N121 and R123 form hydrogen  
165 bonds with the main chain of the loop in the SGNH domain forming the oxyanion hole (residues  
166 A234-D240) (**Figure 3E**). A similar hydrogen bond network is found in NmApe1 (**Table 2**). We  
167 hypothesize that these residues of the CBM35 domain contributes to enzyme catalysis by  
168 stabilizing the oxyanion hole.

169

#### 170 *Two CBM35 loops promote Ape1 O-acetyl esterase activity*

171           To examine if these loops are required for CjApe1 deacetylase activity, site-directed  
172 variants of residues in CBML1 (K103A, Y104G, Q105A, Q106A) and CBML2 (N121A, S122A,  
173 R123A, F132A) were generated in the context of the full-length Ape1<sup>22-392</sup> construct (**Figure**  
174 **4A**). All purified CjApe1 variants were concentrated to higher than 9.5 mg/mL, suggesting the



175 proteins are stable in solution. The *O*-acetyl esterase activity of the wild-type and variant  
176 proteins were assayed using *p*-nitrophenol acetate (*p*NPAc) as a substrate. Controls with *p*NPAc  
177 alone and *p*NPAc incubated with an inactive CjApe1 variant with a substitution of the catalytic  
178 nucleophile (S73A) showed minimal absorbance change at 405 nm (**Figure 4B**). Wild-type  
179 CjApe1 cleaved *p*NPAc at a specific activity of 9.6  $\mu\text{mole}\cdot\text{min}^{-1}\cdot\text{mg}^{-1}$  (**Table 3**). The previously  
180 measured CjApe1 activity ranged from 26.1 to 38.9  $\mu\text{mole}\cdot\text{min}^{-1}\cdot\text{mg}^{-1}$  (19) and the activity of  
181 NgApe1 is 9.98  $\mu\text{mole}\cdot\text{min}^{-1}\cdot\text{mg}^{-1}$  (14). Wild-type activity levels were observed for the K103A  
182 (111%), Y104G (114%), Q106A (103%), S122A (101%) and F132A (96%) variants, indicating  
183 that replacement of these residues did not substantially reduce *O*-acetyl esterase activity. On the  
184 contrary, reduced deacetylase activity was observed for variants Q105A (59%), N121A (60%),  
185 and R123A (34%), suggesting these residues are required for optimal CjApe1 catalysis.

186 To examine whether the reduced activity of the variants Q105A, N121A, and R123A was  
187 due to a deficiency in PG-binding, a PG pulled-down assay was performed. CjApe1 and variant  
188 proteins were incubated with insoluble PG isolated from *C. jejuni*  $\Delta\text{ape1}$ , followed by  
189 centrifugation and wash steps. Proteins pulled down by  $\Delta\text{ape1}$  PG were recovered from the pellet  
190 and quantified using SDS-PAGE. Protein pulled down in the absence of PG was minimal  
191 (**Figure S1A**). Conversely, CjApe1 and variants were pulled down by  $\Delta\text{ape1}$  PG. Relative PG  
192 binding was estimated by band densitometry analysis by comparing the amount of variant  
193 protein pulled down to that of wild-type CjApe1 (**Figure S1B**). Slight reductions were observed  
194 for all variants tested: K103A (94%), Y104G (88%), Q105A (90%), Q106A (82%), N121A  
195 (85%), S122A (91%), R123A (88%) and F132A (78%) (**Figure 4C**); however, the discernable  
196 differences in the amount of protein pulled down did not explain the larger differences in *p*NPAc

197 activity. The site-directed variants support a role for the CBML1 and CBML2 loops in  
198 deacetylase catalysis.

199

### 200 *Ape1-PG binding mode by mechanism-guided HADDOCK docking*

201 To obtain a plausible binding mode of CjApe1 to PG, docking experiments were  
202 performed using HADDOCK2.2 with active site restraints (31,32). The CjApe1 crystal structure  
203 and an ensemble of 10 *O*-acetyl PG conformers were used for docking. The *O*-acetyl PG model  
204 was prepared as a hexasaccharide to approximately match the length of the putative substrate  
205 binding groove (20- 30Å) on the CjApe1 protein surface. Considering ~10% of total  $\Delta$ *ape1* PG is  
206 acetylated (19), only the second MurNAc residue in the hexasaccharide was acetylated. A total  
207 of six unambiguous distance restraints were applied for the CjApe1-PG complex to maintain  
208 catalytically reasonable distances between the catalytic triad, oxyanion hole and the acetyl group  
209 of the hexasaccharide (see methods for details).

210 Of the final 200 docking solutions, 188 were grouped into 7 clusters using a fraction of  
211 common contacts (FCC) cut-off of 0.79 (**Table S2**). All of the clusters showed a convergent  
212 binding mode with an RMSD < 2.5 Å to the model with the best HADDOCK score (lowest  
213 energy) (**Figure S2A**). Importantly, each cluster featured the *O*-acetyl glycan strand sitting along  
214 the interface of the SGNH and CBM35 domains (**Figure 5**). The main difference among the 7  
215 clusters was the direction of *O*-acetyl hexasaccharide (**Figure S2B**), in which the reducing end of  
216 the hexasaccharide, containing the free hydroxyl group at carbon 1, is either close to the CBML1  
217 loop (named as O1→O4) or close to the CBML2 loop (named as O4←O1) (**Figure 5**). 91% of  
218 the 188 solutions, including the best HADDOCK score, belongs to O1→O4; 9% of the 188  
219 solutions were oriented as O4←O1. However, the direction preference cannot be discerned in the

220 docking experiment. Repeating the docking experiment with another random set of simulated PG  
221 conformers resulted in the highest scoring model with the opposite glycan direction, suggesting  
222 the glycan orientation bound to Ape1 varies depending on the input glycan conformers. Between  
223 the top docking solutions, only subtle changes were observed in the phi-psi angle of glycan  
224 strands. The phi-psi angle of the bound glycan strand is comparable to that of the starting  
225 backbone of glycan strand conformers, suggesting the binding pose maintains the low energy  
226 conformer state of the PG hexasaccharide.

227         The protein surface of a representative complex (**Figure 5, left**) is colored by the amino  
228 acid conservation derived from ConSurf analysis (33). The bound glycan strand runs the length  
229 of the putative substrate groove on the CjApe1 surface, and the *O*-acetylated MurNAc sits  
230 adjacent to the catalytic center of the enzyme. Each MurNAc O3 atom is exposed to the solvent,  
231 allowing the peptide stem to point away from Ape1 without steric clashes. In the docked model,  
232 surface loops of CjApe1 are predicted to act like clamps that hold the glycan strand in place  
233 adjacent to the catalytic residues. Loops with residues less than 15 Å from the bound *O*-  
234 acetylated MurNAc include SGNHL1 (loop that connects  $\beta$ 2 and  $\alpha$ 2), SGNHL2 loop (between  
235  $\beta$ 16 and  $\alpha$ 7) and the two CBM35 loops CBML1 and CBML2 (**Figure 5, right**). Loop SGNHL2  
236 contains several conserved residues (K313, Y316 and K318), which may be involved in Ape1  
237 activity through an unidentified mechanism. Residues Q105, N121 and R123 of CBML1 and  
238 CBML2, in which mutations reduced catalytic activity, are within 15 Å from *O*-acetylated  
239 MurNAc.

240

241 ***Structural comparison of Ape1 homologs***

242 To study whether the loops in the active site of CjApe1 determine substrate entry and  
243 binding, CjApe1 was compared to its structural homologs. From a search in the PDB database  
244 using Dali, the NmApe1 (PDB ID: 4K7J) is the closest structural homolog of CjApe1, with an  
245 RMSD of 2.0 Å over 267 aligned C $\alpha$  positions. A carbohydrate esterase of the SGNH  
246 superfamily from *Clostridium thermocellum* (CtCE2; PDB ID: 2WAB) showed an RMSD of 2.7  
247 Å over 98 aligned C $\alpha$  positions.

248 The concave surface that forms the active groove of the CjApe1 and NmApe1 are  
249 generally similar (**Figure 6A-B**). Both CjApe1 and NmApe1 contain long SGNHL2 (17 amino  
250 acids) and short SGNHL1 loops (8 amino acids). CjApe1 and NmApe1 had the largest structural  
251 deviation at loop SGNHL2. In NmApe1, the SGNHL2 loop conformation is nearly 90 ° from of  
252 the equivalent position of this loop in CjApe1 (**Figure 7A-B**). The difference in the  
253 conformation of this loop is likely caused by a disulfide bond between Cys316 and Cys352  
254 observed in the NmApe1 structure (PDB ID: 4K7J). The cysteine residues are conserved in  
255 several bacteria but not in *C. jejuni* (**Figure 7C and Figure S3**).

256 The surface of CtCE2 near the active site is significantly different as compared to CjApe1  
257 and NmApe1. In CtCE2, the SGNHL2 loop is 6 residues long, which is 11 amino acids shorter  
258 than in CjApe1. Conversely, CtCE2 loop SGNHL1 is 4 amino acids longer than the equivalent  
259 loop in CjApe1 (**Figure 6A & 6C**) The shorter SGNHL2 and longer SGNHL1 loops of CtCE2  
260 restructure the substrate binding groove to be 90° from that in Ape1. The consequence of the  
261 altered loops is illustrated by the orientation of bound cellobiose to CtCE2 which is  
262 perpendicular in comparison to the glycan in the CjApe1 docking model (**Figure 6C**).  
263 Collectively, we propose the orientation of substrate binding groove in Ape1 is divergent from

264 that of CtCE2 because of altered loop lengths in the active cleft. Such changes might indicate an  
265 adaptation to substrate specificity.

266

## 267 **Discussion**

268 CBM35 domains are proposed to bind sugars and assist in catalytic efficiency of  
269 glycoside hydrolases (26,30). The domain displays a jelly roll/ $\beta$ -sandwich fold with two  
270 conserved calcium ions binding sites. The first calcium ion is considered a structural site  
271 coordinated by conserved acidic residues. The second calcium ion is typically involved in sugar  
272 binding. The bound sugar is coordinated by the calcium ion and interacts with conserved  
273 residues such as stacking interactions with aromatic residues (Trp and Phe) (25,30,34) and  
274 charged interactions with arginine residues (25,26). The structure of CBM35 in CjApe1 diverges  
275 from CBM35 domains in other glycoside hydrolases. We did not observe bound metal ions nor  
276 the conserved amino acids for metal ion binding, consistent with the observation that EDTA  
277 treatment of NgApe1 did not inhibit Ape1 activity (21). The absence of metal binding is reflected  
278 in the low level of sequence identity of the Ape1 CBM35 and the CBM35 domains from other  
279 glycoside hydrolases.

280 We showed that the CjApe1 CBM35 has two big loops positioned near to the catalytic  
281 triad. The length of these loops is longer than the equivalent loops in other CBM35 domains  
282 suggesting that these long loops evolved for distinct biological function. The catalytic domain of  
283 SGNH hydrolase superfamily is characterized with a canonical  $\alpha/\beta/\alpha$  fold. Interestingly, The  
284 CjApe1 CBM35 domain is inserted between helix  $\alpha 2$  and strand  $\beta 14$  in the  $\alpha/\beta/\alpha$  fold. This  
285 insertion places the big loops of the CBM35 domain in proximity to the active site. Our  
286 mutagenesis results confirmed that residues of the CjApe1 CBM35 domain are important for

287 catalysis. The insertion of CBM35 domain might be an adaptation for CjApe1 for hydrolysis of  
288 the PG substrate.

289         The proposed CjApe1-PG binding model features a long putative substrate binding  
290 groove docked with a six-saccharide polymer. *C. jejuni*  $\Delta$ ape1 showed increased *O*-acetylated of  
291 MurNAc linked to dipeptides, tripeptides, and tetrapeptides when compared to the wild-type  
292 strain (19), suggesting that muropeptide length has little effect on CjApe1 de-*O*-acetylase  
293 activity. Purified NmApe1 is active against various *O*-acetylated muropeptides *in vitro*, but  
294 deletion of *N. meningitidis* ape1 displayed accumulated *O*-acetylated tripeptide levels,  
295 suggesting a preference for *O*-acetylated tripeptides in cell (20). However, the mechanism  
296 leading to a preference for tripeptide substrates in *N. meningitidis* is not known. Our Ape1-PG  
297 complex model suggests that the peptides are positioned away from the protein and do not form  
298 specific interactions. Ape1 is proposed to act as a prerequisite enzyme for LT to control glycan  
299 strand length in the cell (15,19,20). LTs cleave the glycosidic bond between MurNAc and  
300 GlcNAc, and catalyze the concomitant formation of a 1,6-anhydroMurNAc end. During PG  
301 turnover, CjApe1 might efficiently de-*O*-acetylate PG containing glycan strands that are longer  
302 than six saccharides and initiate LT activity for subsequent biological events.

303         A direct binding between Ape1 and LT was recently identified by gel filtration in *N.*  
304 *meningitidis*, revealing a 105 kDa complex from co-elution of NmApe1(40 kDa) and the LT  
305 LtgA (65 kDa) (35). The authors monitored NmApe1 *O*-acetyl esterase activity on *p*NPAC in the  
306 presence of LtgA, finding that maximal NmApe1 activity is dependent on the presence of LtgA.  
307 BLAST searches with LtgA in *C. jejuni* found Slt (*CJJ81176\_0859*) shares 30% with LtgA, and  
308 the recombinant Slt was expressed as described (36). We did not observe a change in CjApe1 *O*-  
309 acetyl esterase activity in the presence of Slt (**Figure S4**). This suggests that the mechanisms of

310 *Ape1* in *C. jejuni* and *N. meningitidis* are distinct, possibly due to requirements of helical shape  
311 maintenance in *C. jejuni* that are absent in spherical *N. meningitidis*.

312 The SGNHL2 loop of CjApe1 displayed distinct conformation from that of  
313 NmApe1 (**Figure 7**). It is important to note that this disulfide bond in SGNHL2 is conserved  
314 among NmApe1 homologs from betaproteobacteria and gammaproteobacteria but is absent in  
315 epsilonproteobacteria (**Figure S3**). In the CjApe1 and in other *Campylobacter* and *Helicobacter*  
316 species, both Cys residues are absent from the SGNHL2 loop. In NgApe1, titration of 5,5'-  
317 dithiobis-(2-nitrobenzoic acid) to quantify free thiolate groups indicated that ~65% of SGNHL2  
318 Cys residues formed a disulfide bond (37). The dynamics of the Cys redox state of NgApe1 (and  
319 NmApe1) is hypothesized to regulate its activity. Upon the treatment of NgApe1 with thiol  
320 oxidizing reagent diamide, activity on pNPAc was reduced by 70%. Treatment of NgApe1 with  
321 the reducing agent glutathione also showed a 30% reduction in activity. Future work on  
322 exploring the function of the SGNHL2 loop on Ape1 activity on PG substrates would help to  
323 understand possible regulatory mechanisms of Ape1 catalysis. Key residues to study by site-  
324 directed mutagenesis include introducing Cys residues at equivalent positions in CjApe1 and the  
325 substitutions at conserved positively charged residues of the SGNHL2 loop (**Figure 5, right**).

326 In our CjApe1-PG model, the binding interface consists of a positively charged groove in  
327 CjApe1 and the glycan saccharides of PG. A high throughput inhibitor screen using fluorogenic  
328 substrate 4-methylumbelliferyl acetate (MU-Ac) identified 7 potential NgApe1 inhibitors (37).  
329 These compounds feature phenyl rings and hydroxyl groups, which show similarity to the  
330 saccharide structure of PG. One of the inhibitors is purpurin ( $K_i=4.8 \mu\text{M}$ ), an anthraquinone-  
331 based compound found in the roots of the plant *Rubia tinctorum*. Attempts to obtain a structure  
332 of the CjApe1-purpurin complex was performed by soaking and co-crystallization experiments.

333 Crystals that were soaked with purpurin turned from clear to yellow in color, suggesting possible  
334 binding. Crystals of Ape1 were obtained from solution in the presence of inhibitor. However,  
335 these crystals showed poor diffraction to  $\sim 6.5$  Å, possibly due to local conformational changes  
336 disrupting crystal packing upon purpurin binding.

337

## 338 **Experimental procedures**

### 339 ***Cloning***

340 A list of strains and primers used in this study can be found in **Table S1**. The expression  
341 vector pET28a-Ape1<sup>22-392</sup> was donated by Dr. Erin Gaynor (19). The encoded product includes  
342 an N-terminal poly-His tag followed by a thrombin cleavage site and the full-length Ape1 protein  
343 without the N-terminal signal peptide (residue 1-21). The expression vector pET28a-Ape1<sup>41-392</sup>  
344 encoding Ape1 protein with an N-terminal His<sub>6</sub>-tag followed by a thrombin cleavage site and  
345 residues 41–392 was constructed using the restriction enzyme double-digestion method. The  
346 portion of *ape1* (*CJJ81176\_0638*) corresponding to the product without the N-terminal signal  
347 peptide and the subsequent 19 residues was amplified from *C. jejuni* 81-176 genomic DNA using  
348 primers Ape1<sup>41-392</sup>(F) and Ape1<sup>41-392</sup>(R). The PCR product and pET-28a(+) vector were digested  
349 with restriction enzymes NheI/BamHI, and ligated together by T4 DNA ligase (NEB). The  
350 recombinant plasmid was then transformed into *E. coli* DH5 $\alpha$ , selected using kanamycin, and  
351 validated by PCR analysis and sequencing.

352 Site-directed mutagenesis was used to generate the CBM35 loop variants K103A,  
353 Y104G, Q105A, Q106A, N121A, S122A, R123A, F132A using pET28a-Ape1<sup>22-392</sup> as a  
354 template. Each primer was 5' phosphorylated and designed to contain a complementary mutation  
355 of the target sequence. Whole-plasmid amplification reactions were performed using Phusion



356 polymerase (NEB) and Ampligase (Epicentre). Reactions were digested with DpnI for 3 hours at  
357 37 °C to remove methylated template vectors.

358

### 359 ***Recombinant protein expression and purification***

360 Ape1<sup>22-392</sup> and Ape1<sup>41-392</sup> proteins were prepared in *E. coli* BL21(DE3) grown overnight  
361 at 37 °C in Luria Bertani (LB) media containing 25 µg/ml kanamycin. Overnight cultures were  
362 inoculated into 1 L LB media at a 1:100 dilution and grown at 37 °C to OD<sub>600</sub> of 0.8-1.0 before  
363 induction with 0.5 mM isopropyl β-D-thiogalactopyranoside (IPTG) at 20 °C for 16 hours. The  
364 cells were pelleted by centrifugation at 5,000 rpm at 4 °C for 15 min. The cell pellet was  
365 resuspended at 4 °C in 50 mM Tris-HCl pH 7.0, 500 mM NaCl, 20 mM Imidazole, 1 mM  
366 phenylmethylsulfonyl fluoride (PMSF), and DNase and lysed using an Emulsi Flex-C5  
367 homogenizer (Avestin). The cell lysate was centrifuged at 16,000 rpm at 4 °C for 50 min, then  
368 the soluble fraction was filtered through 0.22 µm PVDF membrane before loading onto a 5 mL  
369 HisTrap HP column (GE Healthcare). The column was washed with 20 column volumes of 50  
370 mM Tris-HCl pH 7.0, 500 mM NaCl, and Ape1 was eluted with imidazole. Ape1 was dialyzed  
371 against 20 mM Tris-HCl pH 7.0, 150 mM NaCl and simultaneously digested with thrombin  
372 (200:1 w/w Ape1: thrombin ratio) at 4 °C overnight to remove the His<sub>6</sub>-tag. The Ape1-thrombin  
373 mixture was incubated with p-aminobenzamidine-agarose beads (5 mg thrombin:1 mL beads  
374 ratio; Sigma) at 4 °C for 15 min to remove thrombin and was then filtered through a 0.22 µm  
375 PVDF membrane. The cleaved protein was separated using a second HisTrap HP column (GE  
376 Healthcare). His<sub>6</sub>-tag free Ape1 protein was then loaded onto a Superdex 200 10/300 GL column  
377 (GE Healthcare) in 20 mM Tris-HCl pH 7.0, 150 mM NaCl. Finally, monodisperse tag-free  
378 Ape1 was concentrated using 10 kDa MWCO Amicon (Millipore) to 15–20 mg/ml, flash frozen

379 in liquid nitrogen, and stored in  $-80^{\circ}\text{C}$ . Protein purity was assessed by SDS-PAGE and  
380 electrospray ionization mass spectroscopy (MSL/LMB Proteomics Core Facility, UBC).

381 SeMetApe1<sup>41-392</sup> was prepared in *E. coli* BL21(DE3) grown overnight at  $37^{\circ}\text{C}$  in LB  
382 media containing  $25\ \mu\text{g/ml}$  kanamycin. Pelleted cultures were then inoculated in 1 L M9  
383 minimal media (6 g  $\text{Na}_2\text{HPO}_4$ , 3 g  $\text{KH}_2\text{PO}_4$ , 1 g  $\text{NH}_4\text{Cl}$ , 0.5 g  $\text{NaCl}$ , 1 mM  $\text{MgSO}_4$ , 40% (w/v)  
384 glucose, 0.5% (w/v) thiamine, 4.2 g  $\text{Fe}_2\text{SO}_4$ ,  $25\ \mu\text{g/mL}$  kanamycin per liter) and grown at  $37^{\circ}\text{C}$   
385 to an  $\text{OD}_{600}$  of 0.3. 100 mg of L-lysine, L-threonine, L-phenylalanine and 50 mg of L-isoleucine,  
386 L-leucine, L-valine, and L-seleno-methionine were then supplemented into the 1 L culture media,  
387 followed by induction with 0.5 mM IPTG at  $20^{\circ}\text{C}$  for 16 hours. SeMetApe1<sup>41-392</sup> was purified  
388 using the same protocol as for unlabeled protein.

389

### 390 ***Crystallization and Structure determination***

391 Ape1<sup>41-392</sup> was crystallized by hanging drop vapor diffusion. The crystallization well  
392 contained a 900  $\mu\text{l}$  solution of 100 mM CAPS pH 10.5, 200 mM  $\text{NaCl}$ , 16% (w/v) PEG8000,  
393 2.5% (w/v) PEG3350. 1  $\mu\text{L}$  of this solution was mixed with 1  $\mu\text{L}$  Ape1<sup>41-392</sup> (12 mg/ml). A rod-  
394 shaped crystal with a size of 0.2  $\mu\text{m}$  appeared after one day of incubation at room temperature.  
395 The crystal was submerged in 35% (w/v) PEG8000 prepared in the crystallization solution as a  
396 cryoprotectant, then immediately stored in liquid nitrogen before data collection. A native dataset  
397 was collected at 1  $\text{\AA}$  at 100 K on beamline 9-2 at the Stanford Synchrotron Radiation  
398 Lightsource (SSRL; Palo Alto, CA). SeMetApe1<sup>41-392</sup> was crystallized as described for unlabeled  
399 Ape1<sup>41-392</sup> with modification. The crystallization well contained 100 mM CAPS pH 10.5, 200  
400 mM  $\text{NaCl}$ , 16% (w/v) PEG 8000, 12 mM phenol. A 0.4 mm rod-shaped crystal was submersed

401 in cryoprotectant consisting of 35% (w/v) PEG 8000 and 10% (v/v) glycerol prior to freezing. A  
402 single-wavelength anomalous dispersion (SAD) dataset was collected at 0.979 Å.

403 The collected datasets were indexed, integrated, and scaled with HKL2000 (38).

404 Structural determination was conducted using software packages in Phenix (39). SeMetApe1<sup>41-</sup>  
405 <sup>392</sup> SAD dataset was processed in phenix.AutoSol to obtain initial phases and a preliminary  
406 model through automated fitting. Manual model construction of SeMetApe1<sup>41-392</sup> was done with  
407 Coot (40) and phenix.refine. The Ape1<sup>41-392</sup> native dataset was phased by molecular replacement,  
408 and the model was built as described above. The side chains of K49, Q63, K224, K316 of chain  
409 A to C; K177, K313, Q314 and K319 of chain A; K147 and K313 of chain B; K50, K53, E56,  
410 K168, K275, K298, Q361 and D391 of chain C were not modelled due to disorder.

411 Ape1<sup>22-392</sup> was crystallized using hanging drop vapor diffusion. The crystallization well  
412 contained 900 µl of 166 mM sodium acetate, 28% (w/v) PEG4000, and 80 mM Tris-HCl pH 8.5.  
413 1 µl precipitant solution and 1 µl Ape1<sup>22-392</sup> (28 mg/mL) were mixed with 0.2 µl of 10 mM GSH  
414 (L-Glutathione reduced) and 10 mM GSSG (L-Glutathione oxidized) in the hanging drop.  
415 Crystals grew at room temperature within a week. The crystal was briefly soaked in  
416 crystallization solution containing 15% (v/v) glycerol before stored in liquid nitrogen. A native  
417 dataset was collected at 0.98 Å at 100 K at the Canadian Light Source on beamline 08ID-1. Data  
418 process, phasing and model building are same to methods of the Ape1<sup>41-392</sup> model determination.  
419 Side chains of K329 of chain B and D28 of chain A to C were not included in the final model  
420 due to disorder.

421

422 *O-acetyl esterase activity on 4-Nitrophenyl acetate*

423 *O*-acetyl esterase activity was quantified using a colorimetric assay. 20 nM Ape1 protein  
424 and 2 mM *p*NPAc (prepared in methanol and diluted with reaction buffer to a final concentration  
425 of < 1%) were incubated in a 300  $\mu$ l volume of 50 mM sodium phosphate pH 6.5 and 50 mM  
426 NaCl at 25 °C for 5 min. 1 unit of specific activity was defined as the amounts of released *p*-  
427 nitrophenol ( $\mu$ mole) per min per mg of protein. A molar extinction coefficient of 18,000  $M^{-1}cm^{-1}$   
428 for *p*-nitrophenol at 405 nm was used to calculate product formation (41).

429

### 430 ***Peptidoglycan pull-down***

431 40  $\mu$ g of Ape1 or variant proteins were incubated with 50  $\mu$ g of purified *C. jejuni*  $\Delta$ *ape1*  
432 PG in 250  $\mu$ L of reaction buffer (50 mM sodium phosphate pH 6.5, 50 mM NaCl) at 4 °C for 20  
433 min, followed by centrifugation at 13,000 rpm for 10 min. To remove unbound proteins,  
434 insoluble PG and pulled-down proteins were washed three times with 1 mL of buffer. Pulled-  
435 down proteins were analyzed by SDS-PAGE. Band intensities were quantified in ImageJ.

436

### 437 ***HADDOCK docking***

438 A model of the CjApe1-PG complex was produced using HADDOCK 2.2 (31,32). The  
439 Ape1 docking conformer was extracted from the crystal structure of the acetate-bound CjApe1<sup>41-</sup>  
440 <sup>392</sup>, with missing side-chains rebuilt using Coot (40). The binding interface of Ape1 was  
441 predicted using the CPORT server (42). CPORT predicts the consensus binding interface from  
442 the results of 6 prediction servers. An output of active (i.e., involved in binding) and passive  
443 residues ( $\sim$ 5 Å proximal to the binding site) were produced from CPORT.

444 An ensemble of 10 *O*-acetyl hexasaccharide conformers were used to represent the PG  
445 glycan. The phi/psi angles of the  $\beta$ -1,4 glycosidic bond in the hexasaccharide was modelled at

446 69°/12°, as was previously determined by NMR (43). An *O*-acetyl group was manually built  
447 onto the second MurNAc residue of the hexasaccharide using CNS (44). The ensemble of *O*-  
448 acetyl hexasaccharide conformers were generated by simulated annealing and energy  
449 minimization in CNS. All residues in *O*-acetyl hexasaccharide were defined as passive and are  
450 fully flexible in HADDOCK.

451 The list of Ambiguous interaction residues (AIR) is summarized in **Table S2**. A total of 6  
452 unambiguous distance restraints were used in docking. Two involved the triad hydrogen bond  
453 distance: 2.5–3.5 Å between O $\delta$ 2 of the acid D367 and N $\delta$ 1 of the base H369, and 3.5 Å between  
454 N $\epsilon$ 2 of the base H369 and O $\gamma$  of the nucleophile S73. The remaining four involved the bond  
455 distance between the catalytic cleft and the *O*-acetyl group of the substrate, including 2.5–3.5 Å  
456 between the O $\gamma$  of S73 and carbonyl carbon of *O*-acetate, 2.5 Å between the *O*-acetate oxygen  
457 atom to the amide nitrogen of G237 and N $\delta$ 2 of N270 from the oxyanion hole, and 4.0 Å of  
458 hydrophobic contact between the methyl group carbon of *O*-acetate and C $\gamma$  of V368. In the  
459 docking procedure, a sample of 10,000 docking solutions were generated at the rigid body stage.  
460 The top 400 complexes based on HADDOCK scoring were subjected to simulated annealing and  
461 the resulting top 200 complexes were further refined with waters.

462

### 463 **Acknowledgements**

464 Use of the Stanford Synchrotron Radiation Lightsource, SLAC National Accelerator Laboratory,  
465 is supported by the U.S. Department of Energy, Office of Science, Office of Basic Energy  
466 Sciences under Contract No. DE-AC02-76SF00515. The SSRL Structural Molecular Biology  
467 Program is supported by the DOE Office of Biological and Environmental Research, and by the  
468 National Institutes of Health, National Institute of General Medical Sciences (P41GM103393).

469 The contents of this publication are solely the responsibility of the authors and do not necessarily  
470 represent the official views of NIGMS or NIH. Research described in this paper was performed  
471 using Beamline 08B1-1 at the Canadian Light Source, a national research facility of the  
472 University of Saskatchewan, which is supported by the Canada Foundation for Innovation (CFI),  
473 the Natural Sciences and Engineering Research Council (NSERC), the National Research  
474 Council (NRC), the Canadian Institutes of Health Research (CIHR), the Government of  
475 Saskatchewan, and the University of Saskatchewan.

476

#### 477 **Funding and additional information**

478 This research was funded by Canadian Institutes of Health Research (CIHR) grants MOP-  
479 142176 to M.E.P.M. Instrument support was provided by the Natural Sciences and Engineering  
480 Research Council (NSERC) of Canada and the University of British Columbia. The funders had  
481 no role in study design, data collection and interpretation, or the decision to submit the work for  
482 publication.

483

#### 484 **Conflict of interest**

485 The authors declare that they have no conflicts of interest with the contents of this article.

486

#### 487 **References**

- 488 1. Vollmer, W., Blanot, D., and de Pedro, M. A. (2008) Peptidoglycan structure and  
489 architecture. *FEMS Microbiol. Rev.* **32**, 149-167
- 490 2. Do, T., Page, J. E., and Walker, S. (2020) Uncovering the activities, biological roles, and  
491 regulation of bacterial cell wall hydrolases and tailoring enzymes. *J. Biol. Chem.* **295**,  
492 3347-3361
- 493 3. Bera, A., Biswas, R., Herbert, S., and Gotz, F. (2006) The presence of peptidoglycan O-  
494 acetyltransferase in various staphylococcal species correlates with lysozyme resistance  
495 and pathogenicity. *Infect Immun* **74**, 4598-4604

- 496 4. Hebert, L., Courtin, P., Torelli, R., Sanguinetti, M., Chapot-Chartier, M. P., Auffray, Y.,  
497 and Benachour, A. (2007) Enterococcus faecalis constitutes an unusual bacterial model in  
498 lysozyme resistance. *Infect Immun* **75**, 5390-5398
- 499 5. Aubry, C., Goulard, C., Nahori, M. A., Cayet, N., Decalf, J., Sachse, M., Boneca, I. G.,  
500 Cossart, P., and Dussurget, O. (2011) OatA, a peptidoglycan O-acetyltransferase involved  
501 in *Listeria monocytogenes* immune escape, is critical for virulence. *J. Infect. Dis.* **204**,  
502 731-740
- 503 6. Rosenthal, R. S., Blundell, J. K., and Perkins, H. R. (1982) Strain-related differences in  
504 lysozyme sensitivity and extent of O-acetylation of gonococcal peptidoglycan. *Infect*  
505 *Immun* **37**, 826-829
- 506 7. Weadge, J. T., Pfeffer, J. M., and Clarke, A. J. (2005) Identification of a new family of  
507 enzymes with potential O-acetylpeptidoglycan esterase activity in both Gram-positive  
508 and Gram-negative bacteria. *BMC Microbiol.* **5**, 49
- 509 8. Bera, A., Herbert, S., Jakob, A., Vollmer, W., and Gotz, F. (2005) Why are pathogenic  
510 staphylococci so lysozyme resistant? The peptidoglycan O-acetyltransferase OatA is the  
511 major determinant for lysozyme resistance of *Staphylococcus aureus*. *Mol. Microbiol.* **55**,  
512 778-787
- 513 9. Sychantha, D., Jones, C. S., Little, D. J., Moynihan, P. J., Robinson, H., Galley, N. F.,  
514 Roper, D. I., Dowson, C. G., Howell, P. L., and Clarke, A. J. (2017) In vitro  
515 characterization of the antivirulence target of Gram-positive pathogens, peptidoglycan O-  
516 acetyltransferase A (OatA). *PLoS Pathog.* **13**, e1006667
- 517 10. Jones, C. S., Anderson, A. C., and Clarke, A. J. (2021) Mechanism of *Staphylococcus*  
518 *aureus* peptidoglycan O-acetyltransferase A as an O-acyltransferase. *Proc. Natl. Acad.*  
519 *Sci. U. S. A.* **118**
- 520 11. Dillard, J. P., and Hackett, K. T. (2005) Mutations affecting peptidoglycan acetylation in  
521 *Neisseria gonorrhoeae* and *Neisseria meningitidis*. *Infect Immun* **73**, 5697-5705
- 522 12. Moynihan, P. J., and Clarke, A. J. (2010) O-acetylation of peptidoglycan in gram-  
523 negative bacteria: identification and characterization of peptidoglycan O-  
524 acetyltransferase in *Neisseria gonorrhoeae*. *J. Biol. Chem.* **285**, 13264-13273
- 525 13. Moynihan, P. J., and Clarke, A. J. (2014) Substrate specificity and kinetic  
526 characterization of peptidoglycan O-acetyltransferase B from *Neisseria gonorrhoeae*. *J.*  
527 *Biol. Chem.* **289**, 16748-16760
- 528 14. Weadge, J. T., and Clarke, A. J. (2006) Identification and characterization of O-  
529 acetylpeptidoglycan esterase: a novel enzyme discovered in *Neisseria gonorrhoeae*.  
530 *Biochemistry* **45**, 839-851
- 531 15. Moynihan, P. J., and Clarke, A. J. (2011) O-Acetylated peptidoglycan: controlling the  
532 activity of bacterial autolysins and lytic enzymes of innate immune systems. *Int. J.*  
533 *Biochem. Cell Biol.* **43**, 1655-1659
- 534 16. Blackburn, N. T., and Clarke, A. J. (2002) Characterization of soluble and membrane-  
535 bound family 3 lytic transglycosylases from *Pseudomonas aeruginosa*. *Biochemistry* **41**,  
536 1001-1013
- 537 17. Kirk, M. D., Pires, S. M., Black, R. E., Caipo, M., Crump, J. A., Devleeschauwer, B.,  
538 Dopfer, D., Fazil, A., Fischer-Walker, C. L., Hald, T., Hall, A. J., Keddy, K. H., Lake, R.  
539 J., Lanata, C. F., Torgerson, P. R., Havelaar, A. H., and Angulo, F. J. (2015) World  
540 Health Organization Estimates of the Global and Regional Disease Burden of 22



- 541 Foodborne Bacterial, Protozoal, and Viral Diseases, 2010: A Data Synthesis. *PLoS Med.*  
542 **12**, e1001921
- 543 18. Kaakoush, N. O., Castano-Rodriguez, N., Mitchell, H. M., and Man, S. M. (2015) Global  
544 Epidemiology of Campylobacter Infection. *Clin. Microbiol. Rev.* **28**, 687-720
- 545 19. Ha, R., Firdich, E., Sychantha, D., Biboy, J., Taveirne, M. E., Johnson, J. G., DiRita, V.  
546 J., Vollmer, W., Clarke, A. J., and Gaynor, E. C. (2016) Accumulation of Peptidoglycan  
547 O-Acetylation Leads to Altered Cell Wall Biochemistry and Negatively Impacts  
548 Pathogenesis Factors of Campylobacter jejuni. *J. Biol. Chem.* **291**, 22686-22702
- 549 20. Veyrier, F. J., Williams, A. H., Mesnage, S., Schmitt, C., Taha, M. K., and Boneca, I. G.  
550 (2013) De-O-acetylation of peptidoglycan regulates glycan chain extension and affects in  
551 vivo survival of Neisseria meningitidis. *Mol. Microbiol.* **87**, 1100-1112
- 552 21. Weadge, J. T., and Clarke, A. J. (2007) Neisseria gonorrhoeae O-acetylpeptidoglycan  
553 esterase, a serine esterase with a Ser-His-Asp catalytic triad. *Biochemistry* **46**, 4932-4941
- 554 22. Lescic Asler, I., Stefanic, Z., Marsavelski, A., Vianello, R., and Kojic-Prodic, B. (2017)  
555 Catalytic Dyad in the SGNH Hydrolase Superfamily: In-depth Insight into Structural  
556 Parameters Tuning the Catalytic Process of Extracellular Lipase from Streptomyces  
557 rimosus. *ACS Chem. Biol.* **12**, 1928-1936
- 558 23. Pfeffer, J. M., Weadge, J. T., and Clarke, A. J. (2013) Mechanism of action of Neisseria  
559 gonorrhoeae O-acetylpeptidoglycan esterase, an SGNH serine esterase. *J. Biol. Chem.*  
560 **288**, 2605-2613
- 561 24. Williams, A. H., Veyrier, F. J., Bonis, M., Michaud, Y., Raynal, B., Taha, M. K., White,  
562 S. W., Haouz, A., and Boneca, I. G. (2014) Visualization of a substrate-induced  
563 productive conformation of the catalytic triad of the Neisseria meningitidis peptidoglycan  
564 O-acetylcysteine esterase reveals mechanistic conservation in SGNH esterase family members.  
565 *Acta Crystallogr. D Biol. Crystallogr.* **70**, 2631-2639
- 566 25. Montanier, C., van Bueren, A. L., Dumon, C., Flint, J. E., Correia, M. A., Prates, J. A.,  
567 Firbank, S. J., Lewis, R. J., Grondin, G. G., Ghinet, M. G., Gloster, T. M., Herve, C.,  
568 Knox, J. P., Talbot, B. G., Turkenburg, J. P., Kerovuo, J., Brzezinski, R., Fontes, C. M.,  
569 Davies, G. J., Boraston, A. B., and Gilbert, H. J. (2009) Evidence that family 35  
570 carbohydrate binding modules display conserved specificity but divergent function. *Proc.*  
571 *Natl. Acad. Sci. U. S. A.* **106**, 3065-3070
- 572 26. Sainz-Polo, M. A., Valenzuela, S. V., Gonzalez, B., Pastor, F. I., and Sanz-Aparicio, J.  
573 (2014) Structural analysis of glucuronoxylan-specific Xyn30D and its attached CBM35  
574 domain gives insights into the role of modularity in specificity. *J. Biol. Chem.* **289**,  
575 31088-31101
- 576 27. Terwilliger, T. C., Grosse-Kunstleve, R. W., Afonine, P. V., Moriarty, N. W., Zwart, P.  
577 H., Hung, L. W., Read, R. J., and Adams, P. D. (2008) Iterative model building, structure  
578 refinement and density modification with the PHENIX AutoBuild wizard. *Acta*  
579 *Crystallogr. D Biol. Crystallogr.* **64**, 61-69
- 580 28. Krissinel, E., and Henrick, K. (2007) Inference of macromolecular assemblies from  
581 crystalline state. *J. Mol. Biol.* **372**, 774-797
- 582 29. Holm, L. (2020) DALI and the persistence of protein shape. *Protein Sci.* **29**, 128-140
- 583 30. Suzuki, N., Fujimoto, Z., Kim, Y. M., Momma, M., Kishine, N., Suzuki, R., Suzuki, S.,  
584 Kitamura, S., Kobayashi, M., Kimura, A., and Funane, K. (2014) Structural elucidation  
585 of the cyclization mechanism of alpha-1,6-glucan by Bacillus circulans T-3040  
586 cycloisomaltooligosaccharide glucanotransferase. *J. Biol. Chem.* **289**, 12040-12051



- 587 31. Dominguez, C., Boelens, R., and Bonvin, A. M. (2003) HADDOCK: a protein-protein  
588 docking approach based on biochemical or biophysical information. *J. Am. Chem. Soc.*  
589 **125**, 1731-1737
- 590 32. van Zundert, G. C. P., Rodrigues, J., Trellet, M., Schmitz, C., Kastiris, P. L., Karaca, E.,  
591 Melquiond, A. S. J., van Dijk, M., de Vries, S. J., and Bonvin, A. (2016) The  
592 HADDOCK2.2 Web Server: User-Friendly Integrative Modeling of Biomolecular  
593 Complexes. *J. Mol. Biol.* **428**, 720-725
- 594 33. Ashkenazy, H., Erez, E., Martz, E., Pupko, T., and Ben-Tal, N. (2010) ConSurf 2010:  
595 calculating evolutionary conservation in sequence and structure of proteins and nucleic  
596 acids. *Nucleic Acids Res.* **38**, W529-533
- 597 34. Couturier, M., Roussel, A., Rosengren, A., Leone, P., Stalbrand, H., and Berrin, J. G.  
598 (2013) Structural and biochemical analyses of glycoside hydrolase families 5 and 26  
599 beta-(1,4)-mannanases from *Podospira anserina* reveal differences upon manno-  
600 oligosaccharide catalysis. *J. Biol. Chem.* **288**, 14624-14635
- 601 35. Williams, A. H., Wheeler, R., Deghmane, A. E., Santecchia, I., Schaub, R. E., Hicham,  
602 S., Moya Nilges, M., Malosse, C., Chamot-Rooke, J., Haouz, A., Dillard, J. P., Robins,  
603 W. P., Taha, M. K., and Gomperts Boneca, I. (2020) Defective lytic transglycosylase  
604 disrupts cell morphogenesis by hindering cell wall de-O-acetylation in *Neisseria*  
605 *meningitidis*. *Elife* **9**
- 606 36. Vijayaraghavan, J., Kumar, V., Krishnan, N. P., Kaufhold, R. T., Zeng, X., Lin, J., and  
607 van den Akker, F. (2018) Structural studies and molecular dynamics simulations suggest  
608 a processive mechanism of exolytic lytic transglycosylase from *Campylobacter jejuni*.  
609 *PLoS One* **13**, e0197136
- 610 37. Pfeffer, J. M., and Clarke, A. J. (2012) Identification of the first known inhibitors of O-  
611 acetylpeptidoglycan esterase: a potential new antibacterial target. *ChemBioChem* **13**, 722-  
612 731
- 613 38. Otwinowski, Z., and Minor, W. (1997) [20] Processing of X-ray diffraction data collected  
614 in oscillation mode. *Methods Enzymol.* **276**, 307-326
- 615 39. Liebschner, D., Afonine, P. V., Baker, M. L., Bunkoczi, G., Chen, V. B., Croll, T. I.,  
616 Hintze, B., Hung, L. W., Jain, S., McCoy, A. J., Moriarty, N. W., Oeffner, R. D., Poon,  
617 B. K., Prisant, M. G., Read, R. J., Richardson, J. S., Richardson, D. C., Sammito, M. D.,  
618 Sobolev, O. V., Stockwell, D. H., Terwilliger, T. C., Urzhumtsev, A. G., Videau, L. L.,  
619 Williams, C. J., and Adams, P. D. (2019) Macromolecular structure determination using  
620 X-rays, neutrons and electrons: recent developments in Phenix. *Acta Crystallogr D Struct*  
621 *Biol* **75**, 861-877
- 622 40. Emsley, P., Lohkamp, B., Scott, W. G., and Cowtan, K. (2010) Features and development  
623 of Coot. *Acta Crystallogr. D Biol. Crystallogr.* **66**, 486-501
- 624 41. Zhang, Z. Y., Clemens, J. C., Schubert, H. L., Stuckey, J. A., Fischer, M. W., Hume, D.  
625 M., Saper, M. A., and Dixon, J. E. (1992) Expression, purification, and physicochemical  
626 characterization of a recombinant *Yersinia* protein tyrosine phosphatase. *J. Biol. Chem.*  
627 **267**, 23759-23766
- 628 42. de Vries, S. J., and Bonvin, A. M. (2011) CPORT: a consensus interface predictor and its  
629 performance in prediction-driven docking with HADDOCK. *PLoS One* **6**, e17695
- 630 43. Schanda, P., Triboulet, S., Laguri, C., Bougault, C. M., Ayala, I., Callon, M., Arthur, M.,  
631 and Simorre, J. P. (2014) Atomic model of a cell-wall cross-linking enzyme in complex  
632 with an intact bacterial peptidoglycan. *J. Am. Chem. Soc.* **136**, 17852-17860

- 633 44. Brunger, A. T. (2007) Version 1.2 of the Crystallography and NMR system. *Nat. Protoc.*  
634 **2**, 2728-2733
- 635 45. Sievers, F., Wilm, A., Dineen, D., Gibson, T. J., Karplus, K., Li, W., Lopez, R.,  
636 McWilliam, H., Remmert, M., Soding, J., Thompson, J. D., and Higgins, D. G. (2011)  
637 Fast, scalable generation of high-quality protein multiple sequence alignments using  
638 Clustal Omega. *Mol. Syst. Biol.* **7**, 539
- 639 46. Robert, X., and Gouet, P. (2014) Deciphering key features in protein structures with the  
640 new ENDscript server. *Nucleic Acids Res.* **42**, W320-324  
641
- 642

643 Tables

644 TABLE 1

645 Data collection and model refinement statistics of *C. jejuni* Ape1

|                                                     | Ape1 <sup>41-392</sup> | SeMetApe1 <sup>41-392</sup> | Ape1 <sup>22-392</sup> |
|-----------------------------------------------------|------------------------|-----------------------------|------------------------|
| <b>Data collection<sup>a</sup></b>                  |                        |                             |                        |
| Space group                                         | P3 <sub>2</sub>        | P3 <sub>2</sub>             | P3 <sub>2</sub>        |
| Cell dimensions                                     |                        |                             |                        |
| <i>a</i> , <i>b</i> , <i>c</i> (Å)                  | 94.9, 94.9, 102.7      | 95.3, 95.3, 103.1           | 95.3, 95.3, 103.0      |
| $\alpha$ , $\beta$ , $\gamma$ (°)                   | 90, 90, 120            | 90, 90, 120                 | 90, 90, 120            |
| Total reflections                                   | 546678                 | 696966                      | 271029                 |
| No. of unique reflections                           | 95429                  | 111763                      | 46459                  |
| Wavelength (Å)                                      | 0.97946                | 0.97915                     | 0.98011                |
| Resolution (Å)                                      | 50.0–1.80 (1.83–1.80)  | 50.0–1.70 (1.73–1.70)       | 50.0–2.30 (2.34–2.30)  |
| R <sub>merge</sub>                                  | 0.100 (0.798)          | 0.087 (0.614)               | 0.148 (0.782)          |
| <i>I</i> / $\sigma$ <i>I</i>                        | 18.3 (1.7)             | 23.0 (2.6)                  | 13.2 (2.3)             |
| CC (1/2)                                            | (0.810)                | (0.859)                     | (0.653)                |
| Completeness (%)                                    | 99.7 (99.7)            | 97.1 (98.6)                 | 100 (100)              |
| Redundancy                                          | 5.7 (5.1)              | 6.2 (6.4)                   | 5.8 (5.8)              |
| <b>Refinement</b>                                   |                        |                             |                        |
| Resolution (Å)                                      | 34.9–1.80              |                             | 43.70–2.30             |
| <i>R</i> <sub>work</sub> / <i>R</i> <sub>free</sub> | 16.7/18.8              |                             | 14.3/18.1              |
| <b>Ramachandran</b>                                 |                        |                             |                        |
| Favored (%)                                         | 96.7%                  |                             | 96.2%                  |
| Allowed (%)                                         | 3.3%                   |                             | 3.8%                   |
| Outliers (%)                                        | 0%                     |                             | 0%                     |
| <b>Average B factors (Å<sup>2</sup>)</b>            |                        |                             |                        |
| Protein                                             | 27.2                   |                             | 30.71                  |
| Water                                               | 31.4                   |                             | 37.43                  |
| <b>RMSDs</b>                                        |                        |                             |                        |
| Bond lengths (Å)                                    | 0.003                  |                             | 0.002                  |
| Bond angles (°)                                     | 0.562                  |                             | 0.510                  |
| PDB code                                            | 7SB0                   |                             | 7SB1                   |

646 <sup>a</sup>Values for the highest resolution shells are shown in parentheses.

647

648 TABLE 2

649 H-bond network between the CBM35 loop and the oxyanion hole

| <b>CjApe1</b> |               |              | <b>NmApe1<sup>a</sup></b> |               |              |
|---------------|---------------|--------------|---------------------------|---------------|--------------|
| CBM35         | Oxyanion hole | Distance (Å) | CBM35                     | Oxyanion hole | Distance (Å) |
| Q105, Nε2     | A234, O       | 3.0          | Q115, Nε2                 | G233, O       | 2.8          |
| Q105, Oε2     | N236, N       | 2.9          | Q115, Oε2                 | N235, N       | 3.0          |
| N121, Oδ1     | R123, N       | 3.0          | T130, Oγ1                 | R132, N       | 3.2          |
| R123, Nε      | G237, O       | 2.7          | R132, Nε                  | N235, O       | 3.5          |

650 <sup>a</sup>The NmApe1 model is derived from PDB 4K7J.

651

652 TABLE 3

653 *O*-acetyl esterase activity of CBM35 loop variants on *p*NPAc

| Group        | Enzyme         | Specific activity <sup>a</sup><br>(μmol min <sup>-1</sup> mg <sup>-1</sup> ) | Residual activity <sup>b</sup><br>(100%) |
|--------------|----------------|------------------------------------------------------------------------------|------------------------------------------|
|              | Ape1 wild-type | 9.6 ± 0.2                                                                    | 100                                      |
| Nucleophile  | S73A           | 0 ± 0.3                                                                      | 0                                        |
| CBM35 Loop 1 | K103A          | 10.7 ± 0.1                                                                   | 111                                      |
|              | Y104G          | 10.9 ± 0.9                                                                   | 114                                      |
|              | Q105A          | 5.7 ± 0.3                                                                    | 59                                       |
|              | Q106A          | 9.9 ± 0.7                                                                    | 103                                      |
| CBM35 Loop 2 | N121A          | 5.8 ± 0.3                                                                    | 60                                       |
|              | S122A          | 9.7 ± 0.7                                                                    | 101                                      |
|              | R123A          | 3.3 ± 0.3                                                                    | 34                                       |
|              | F132A          | 9.2 ± 0.4                                                                    | 96                                       |

654 <sup>a</sup>Enzyme assay was measured at 25 °C in triplicate using 20 nM Ape1 enzyme and 2 mM *p*NPAc  
655 substrate in buffer (50 mM sodium phosphate, 50 mM NaCl, pH 6.5).

656 <sup>b</sup>Residual activity is defined as the percentage of Ape1 wild-type activity.

657

658

659 Figures and figure legends

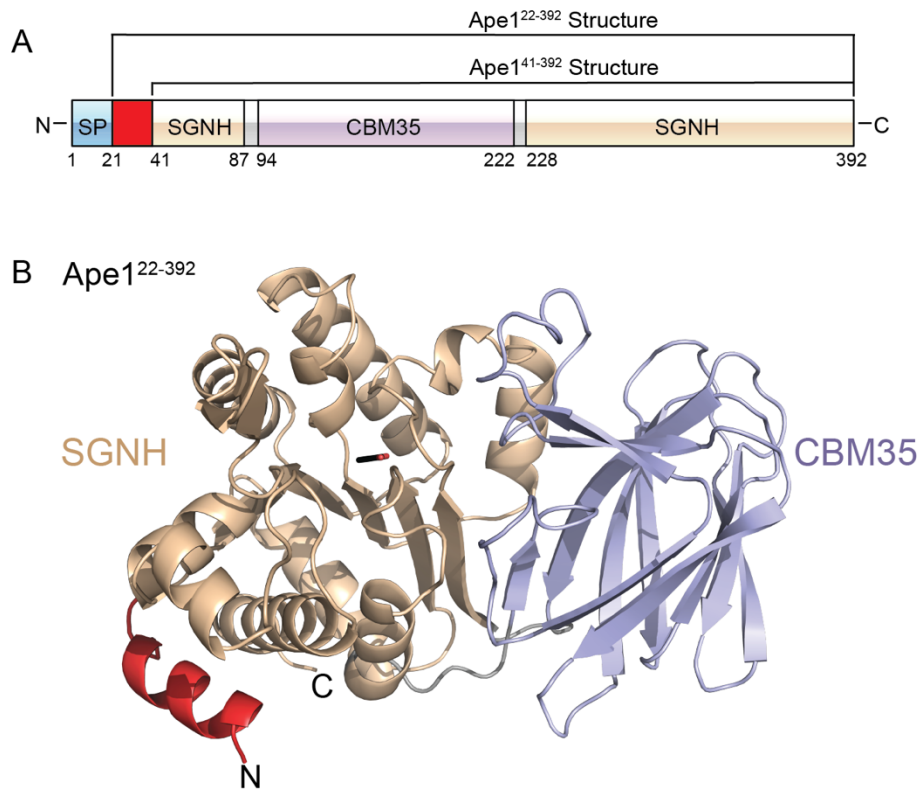

660

661 Figure 1. The crystal structure of *C. jejuni* Ape1. (A) Schematic representation of full-length  
662 Ape1 (SP = signal peptide). The regions corresponding to recombinant Ape1<sup>41-392</sup> and Ape1<sup>22-392</sup>  
663 proteins are labeled. (B) The overall structure of acetate-bound Ape1<sup>22-392</sup> with the N-terminal  
664 helix, SGNH and CBM35 domains colored in red, brown and light purple, respectively. The  
665 acetate is shown in stick form.

666

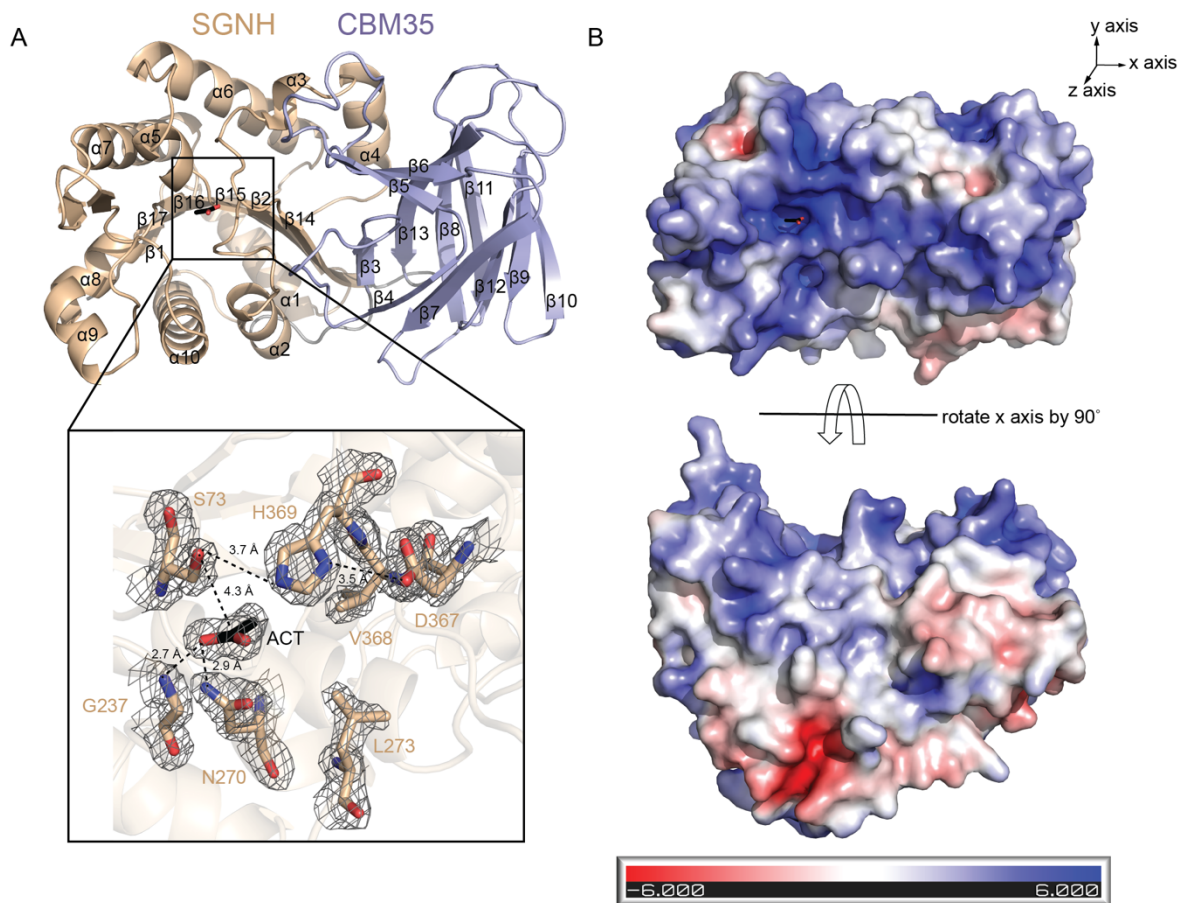

667  
 668 Figure 2. Active site arrangement and electrostatic potential properties of Ape1<sup>41-392</sup>. (A)  
 669 Magnified view of the active site. The catalytic triad (S73-H369-D367), oxyanion hole (G237  
 670 and N270) and conserved hydrophobic residues (V368 and L273) are shown in stick form  
 671 (nitrogen, blue; oxygen, red; carbon, brown). The electron density is shown as a weighted  $2F_{obs}-$   
 672  $F_{cal}$  map contoured at  $1 \sigma$ . Hydrogen bond networks between residues of the triad are drawn as  
 673 dashed lines. (B) The electrostatic potential ( $\pm 6$  kT/e) plotted onto the solvent accessible surface  
 674 of CjApe1. The surface charge was calculated using the APBS plugin in PyMOL, and the input  
 675 Ape1 structure containing charge and radius information for each atom was prepared using the  
 676 PDB2PQR web server.  
 677

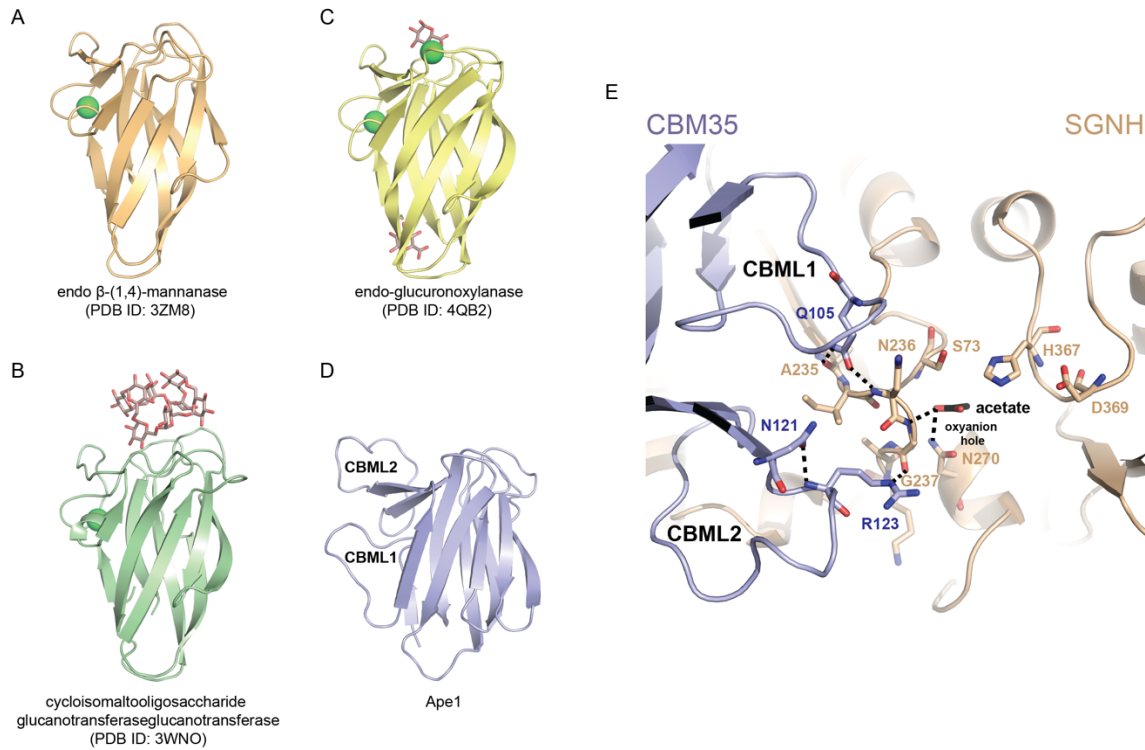

678

679 Figure 3. Structural comparison of CBM35 structural homologs. Comparison of CBM35 domain

680 structural homologs: (A) *Podospora anserina*,  $\beta$ -(1,4)-mannanase, PDB 3ZM8; (B)

681 *Paenibacillus barcinonensis*, Xyn30D, PDB 4QB2; (C) *Bacillus circulans*,

682 cycloisomaltooligosaccharide glucanotransferase, PDB: 3WNO; (D) *Campylobacter jejuni*,

683 Ape1. Bound calcium ions and bound saccharides are displayed in green sphere and stick form,

684 respectively. (E) Residue Q105 of CBML1 and residue R123 of CBML2 make H-bonds to

685 residue A235, N236, G237 of the oxyanion hole loop. H-bonds are shown as black dashed lines

686 between atoms.



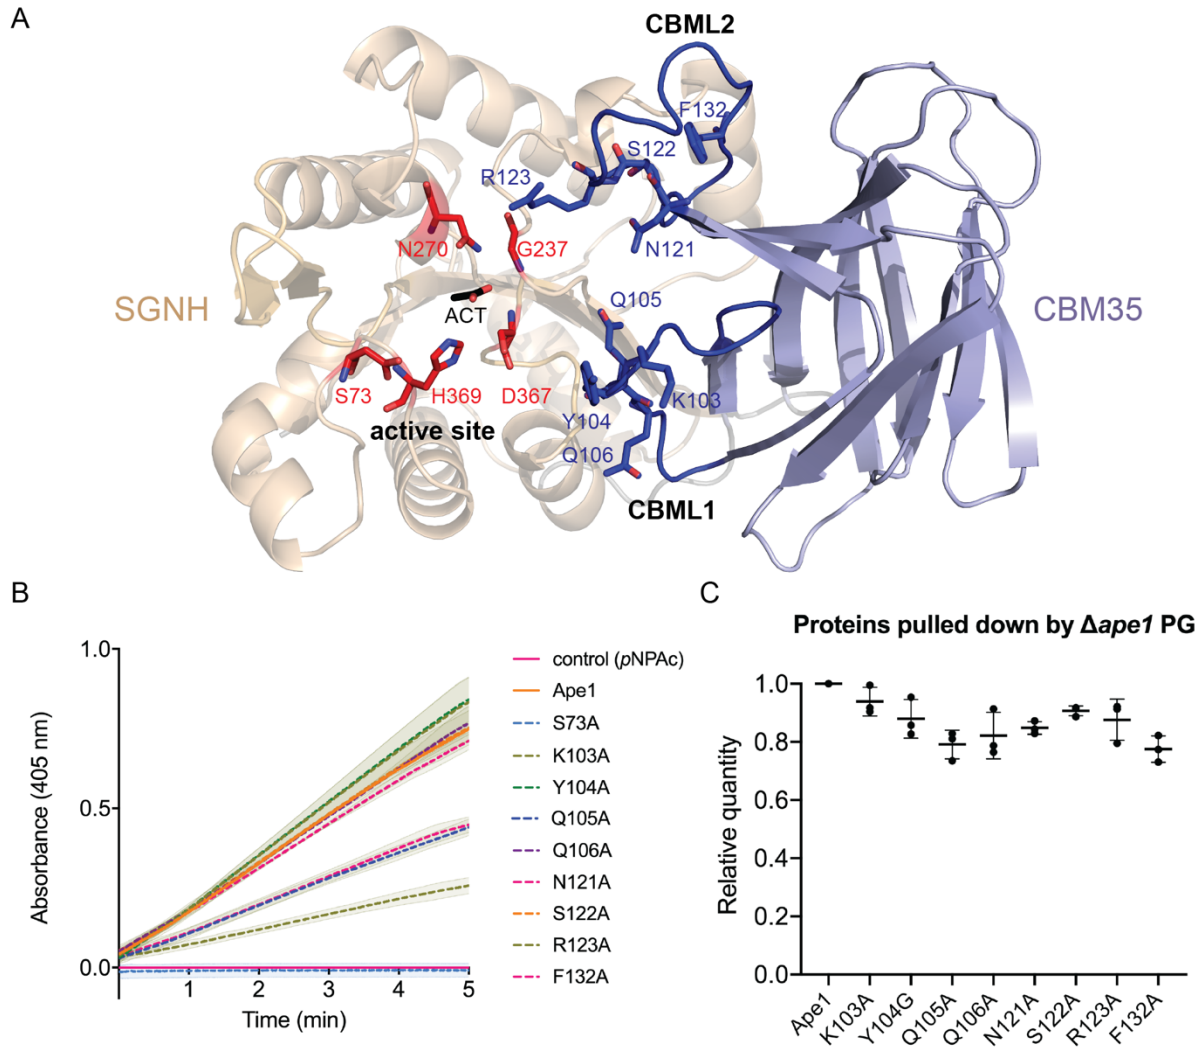

687

688 Figure 4. *O*-acetyl esterase activity and PG binding assays of CBM35 loop variants. (A)

689 Residues predicted to be involved in catalysis of *O*-acetylated PG, shown in stick form. The

690 catalytic triad and oxyanion hole are colored in red. CBM35 loops are colored in blue. (B) *O*-

691 acetyl esterase activity of the CjApe1 variants. Purified Ape1 and variants were incubated with

692 *p*NPAC in 50 mM Na<sub>2</sub>HPO<sub>4</sub>/NaH<sub>2</sub>PO<sub>4</sub>, 50 mM NaCl, pH 6.5 at 25 °C for 5 min. The rate of *p*NP

693 generation was monitored spectrophotometrically at 405 nm. Assays were performed in

694 triplicate, mean data are plotted in lines, and errors (within ± standard deviation) are shown as

695 filled area. (C) Binding of CBM35 loop variants to Δ*ape1* PG. Wild-type and variant proteins

696 were incubated with *C. jejuni* Δ*ape1* PG in 50 mM Na<sub>2</sub>HPO<sub>4</sub>/NaH<sub>2</sub>PO<sub>4</sub>, 50 mM NaCl, pH 6.5 at



697 4 °C for 20 min. Unbound proteins were washed with buffer and removed by centrifugation.  
698 Proteins pulled-down by PG were recovered using buffer and analyzed by SDS-PAGE. Band  
699 intensities were quantified using ImageJ. The relative quantity (%) was calculated as amounts of  
700 pulled-down variants relative to pulled-down wild-type (set as 1). Assays were performed in  
701 triplicate, and data are shown as mean  $\pm$  the standard deviation. Each dot reflects an individual  
702 experiment.  
703

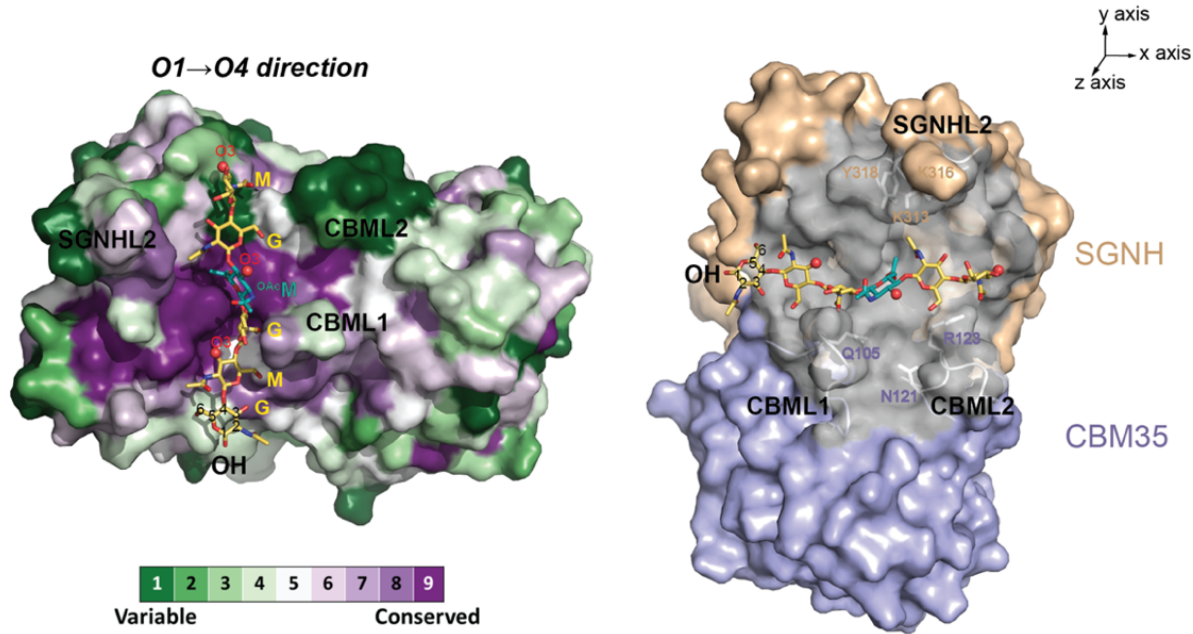

704

705 Figure 5. HADDOCK model of the CjApe1-O-acetyl hexasaccharide complex. The CjApe1-O-

706 acetyl hexasaccharide model presents the best HADDOCK scoring solution in the docking

707 experiment. Two views are rotated by 90° along the z axis as to emphasize that the proximal

708 loops form a clamp that holds a hexasaccharide. In the left panel, CjApe1 is shown in the

709 surface representation colored by amino acid conservation. The O-acetyl hexasaccharide is

710 shown in stick form and saccharide residues (MurNac=M; GlcNac=G; O-acetylated

711 MurNac=OAcM) are labelled. MurNac O3 atoms are highlighted as red spheres. In the right

712 panel, residues that are within 15 Å to O-acetylated MurNac are colored in grey, including

713 SGNHL1, CBML1 and CBML2. The predicated functional residues in these loops are labelled.

714

A CjApe1

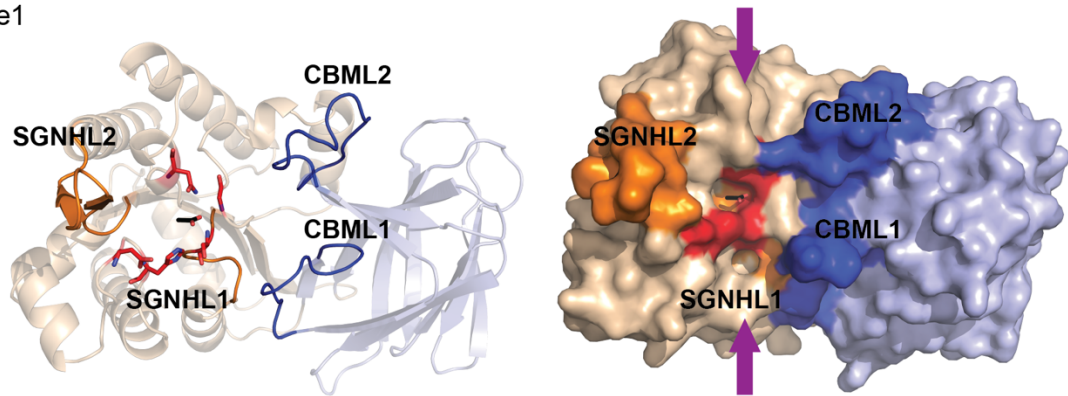

B NmApe1

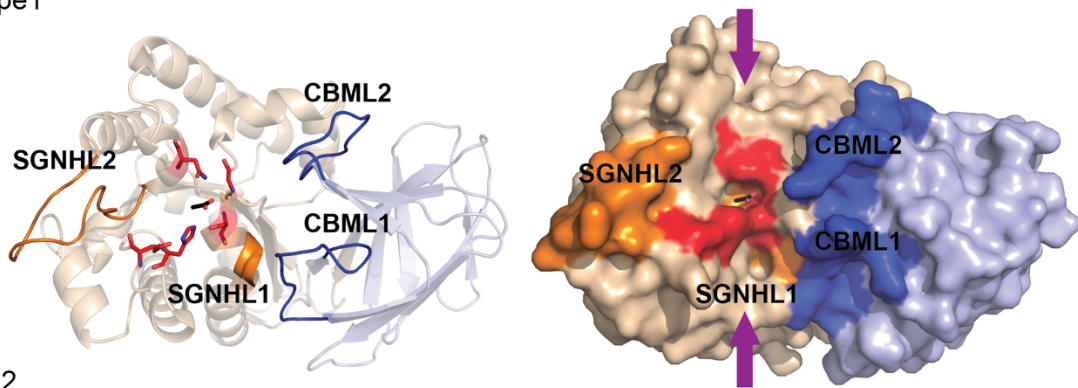

C CtCE2

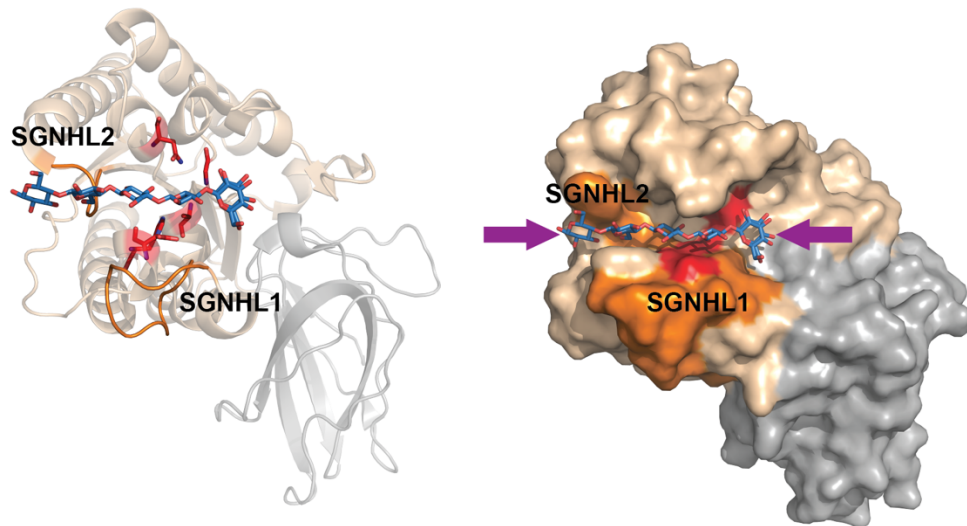

715

716 Figure 6. Comparison of proposed substrate binding orientations within the SGNH hydrolase  
717 superfamily. Structures of (A) CjApe1, (B) NmApe1 (PDB 4K7J) and (C) CtCE2 (PDB: 2WAB)  
718 are shown as cartoons (left) and surface representations (right). These structures are aligned

719 based on the orientation of the SGNH domains. The orientation of glycan substrates bound in the  
720 active site grooves are indicated using purple arrows. Loops involved in determining the  
721 substrate orientation are highlighted (SGNHL1 and SGNHL2, orange; CBML1 and CBML2;  
722 blue). Conserved SGNH domain catalytic residues are shown in stick form and colored red.  
723

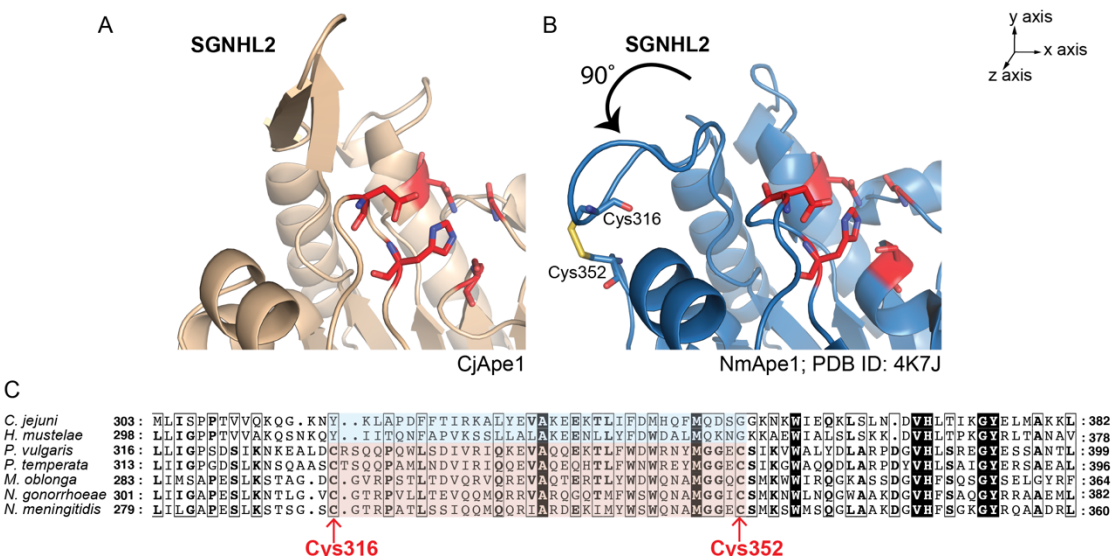

724

725 Figure 7. Structure of the SNGHL2 loop and sequence alignment. (A) Cartoon representation of  
 726 the SGNHL2 loop from CjApe1. Conserved SGNH domain catalytic residues are shown as sticks  
 727 and colored red. (B) NmApe1 (PDB 4K7J blue; 4K9S green). The SGNHL2 loop of CjApe1 is  
 728 orientated 90° about the z-axis in comparison to the loops in the NmApe1 structure. Residues  
 729 constituting the disulfide bond are shown in stick form (nitrogen, blue; oxygen, red; sulfur,  
 730 yellow). (C) Sequence alignment of CjApe1 homologs performed in Clustal Omega (45) and  
 731 presented by ESPrict (46). Highlighted in this partial alignment is the Cys-Cys bond of the  
 732 SGNHL2 loop. Ape1 homologs: *Helicobacter mustelae* (WP\_013022746.1); *Proteus vulgaris*  
 733 (WP\_185901317.1); *Photorhabdus temperata* (WP\_023045068.1); *Moraxella oblonga*  
 734 (WP\_066805747.1); *Neisseria gonorrhoeae* (WP\_003695451.1); *Neisseria meningitidis*  
 735 (WP\_049224741.1).
